# Supplementary material for: Oil type and temperature dependent biodegradation dynamics - Combining chemical and microbial community data through multivariate analysis
Source: PubMed Central journal article supplement (PMC6081865; doi:10.1186/s12866-018-1221-9), 2018-08-07
Supplement: 12866_2018_1221_MOESM1_ESM.pdf [file 12866_2018_1221_MOESM1_ESM.pdf]

Table S1. Experimental design. Sampling days and number of replicates are described for all experimental analyses. The following coding system is applied: X + Y + Z, where X is number of replicates for oil dispersions in natural unfiltered seawater, Y is number of replicates for dispersions in sterilized filtered seawater, and Z is number of replicates for natural unfiltered seawater without oil.

| Sampling day | Particle counts (Coulter Counter) | Microbial communities (DNA extraction) | Cell counts and oxygen consumption (DAPI/MPN/O <sub>2</sub> ) | Chemical analyses (GC/FID and GC-MS) | Oil:Temp   |
|--------------|-----------------------------------|----------------------------------------|---------------------------------------------------------------|--------------------------------------|------------|
| 0            | 2+0+1                             | 2+0+1                                  | 2+0+1                                                         | 2+1+1                                | TROLL:13°C |
| 7            | 2+1+1                             | 2+0+1                                  | 2+0+1                                                         | 2+1+1                                |            |
| 14           | 2+1+1                             | 2+0+1                                  | 2+0+1                                                         | 2+1+1                                |            |
| 30           | 2+1+1                             | 2+0+1                                  | 2+0+1                                                         | 2+1+1                                |            |
| 0            | 2+1+1                             | 2+0+1                                  | 2+0+1                                                         | 2+1+1                                | TROLL:5°C  |
| 6            | 2+1+1                             | 2+0+1                                  | 2+0+1                                                         | 2+1+1                                |            |
| 9            | 2+1+1                             | 2+0+1                                  | 2+0+1                                                         | 2+1+1                                |            |
| 13           | 2+1+1                             | 2+0+1                                  | 2+0+1                                                         | 2+1+1                                |            |
| 16           | 2+1+1                             | 2+0+1                                  | 2+0+1                                                         | 2+1+1                                |            |
| 30           | 2+1+1                             | 2+0+1                                  | 2+0+1                                                         | 2+1+1                                |            |
| 64           | 2+1+1                             | 2+0+1                                  | 2+0+1                                                         | 2+1+1                                |            |
| 0            | 2+1+1                             | 2+0+1                                  | 2+0+1                                                         | 2+1+1                                | GRANE:13°C |
| 3            | 2+1+1                             | 2+0+1                                  | 2+0+1                                                         | 2+1+1                                |            |
| 7            | 2+1+1                             | 2+0+1                                  | 2+0+1                                                         | 2+1+1                                |            |
| 14           | 2+1+1                             | 2+0+1                                  | 2+0+1                                                         | 2+1+1                                |            |
| 21           | 2+1+1                             | 2+0+1                                  | 2+0+1                                                         | 2+1+1                                |            |
| 30           | 2+1+1                             | 2+0+1                                  | 2+0+1                                                         | 2+1+1                                |            |
| 64           | 2+1+1                             | 2+0+1                                  | 2+0+1                                                         | 2+1+1                                |            |
| 0            | 2+1+1                             | 2+0+1                                  | 2+0+1 (only O <sub>2</sub> )                                  | 2+1+1                                | GRANE:5°C  |
| 6            | 3+1+1                             | 3+0+1                                  | 3+0+1                                                         | 3+1+1                                |            |
| 9            | 3+1+1                             | 3+0+1                                  | 3+0+1 (only O <sub>2</sub> )                                  | 3+1+1                                |            |
| 13           | 3+1+1                             | 3+0+1                                  | 3+0+1                                                         | 3+1+1                                |            |
| 16           | 3+1+1                             | 3+0+1                                  | 3+0+1 (only O <sub>2</sub> )                                  | 3+1+1                                |            |
| 30           | 3+1+1                             | 3+0+1                                  | 3+0+1                                                         | 3+1+1                                |            |
| 64           | 3+1+1                             | 3+0+1                                  | 3+0+1                                                         | 3+1+1                                |            |
