# Supplementary material for: Oil type and temperature dependent biodegradation dynamics - Combining chemical and microbial community data through multivariate analysis
Source: PubMed Central journal article supplement (PMC6081865; doi:10.1186/s12866-018-1221-9), 2018-08-07
Supplement: 12866_2018_1221_MOESM3_ESM.pdf [file 12866_2018_1221_MOESM3_ESM.pdf]

Table S3. List of abbreviations for aromatics compounds used in correlation plots

| Group                      | Compound                     | Abb          |
|----------------------------|------------------------------|--------------|
| Naphthalenes               | Naphthalene                  | N            |
|                            | C1-naphthalenes              | N1           |
|                            | C2-naphthalenes              | N2           |
|                            | C3-naphthalenes              | N3           |
|                            | C4-naphthalenes              | N4           |
| 2-3 ring PAHs              | Biphenyl                     | B            |
|                            | Acenaphthylene               | ANY          |
|                            | Acenaphthene                 | ANA          |
|                            | Dibenzofuran                 | DBF          |
|                            | Fluorene                     | F            |
|                            | C1-fluorenes                 | F1           |
|                            | C2-fluorenes                 | F2           |
|                            | C3-fluorenes                 | F3           |
|                            | Phenanthrene                 | P            |
|                            | C1-phenanthrenes/anthracenes | P1           |
|                            | C2-phenanthrenes/anthracenes | P2           |
|                            | C3-phenanthrenes/anthracenes | P3           |
|                            | C4-phenanthrenes/anthracenes | P4           |
|                            | Dibenzothiophene             | D            |
|                            | C1-dibenzothiophenes         | D1           |
|                            | C2-dibenzothiophenes         | D2           |
|                            | C3-dibenzothiophenes         | D3           |
|                            | C4-dibenzothiophenes         | D4           |
|                            | 4-6 ring PAHs                | Fluoranthene |
| Pyrene                     |                              | PY           |
| C1-fluoranthrenes/pyrenes  |                              | FL1          |
| C2-fluoranthrenes/pyrenes  |                              | FL2          |
| C3-fluoranthrenes/pyrenes  |                              | FL3          |
| Benz[ <i>a</i> ]anthracene |                              | BA           |
| Chrysene                   |                              | C            |
| C1-chrysenes               |                              | C1           |
| C2-chrysenes               |                              | C2           |
| C3-chrysenes               |                              | C3           |
| C4-chrysenes               | C4                           |              |
