# Supplementary material for: Oil type and temperature dependent biodegradation dynamics - Combining chemical and microbial community data through multivariate analysis
Source: PubMed Central journal article supplement (PMC6081865; doi:10.1186/s12866-018-1221-9), 2018-08-07
Supplement: 12866_2018_1221_MOESM4_ESM.pdf [file 12866_2018_1221_MOESM4_ESM.pdf]

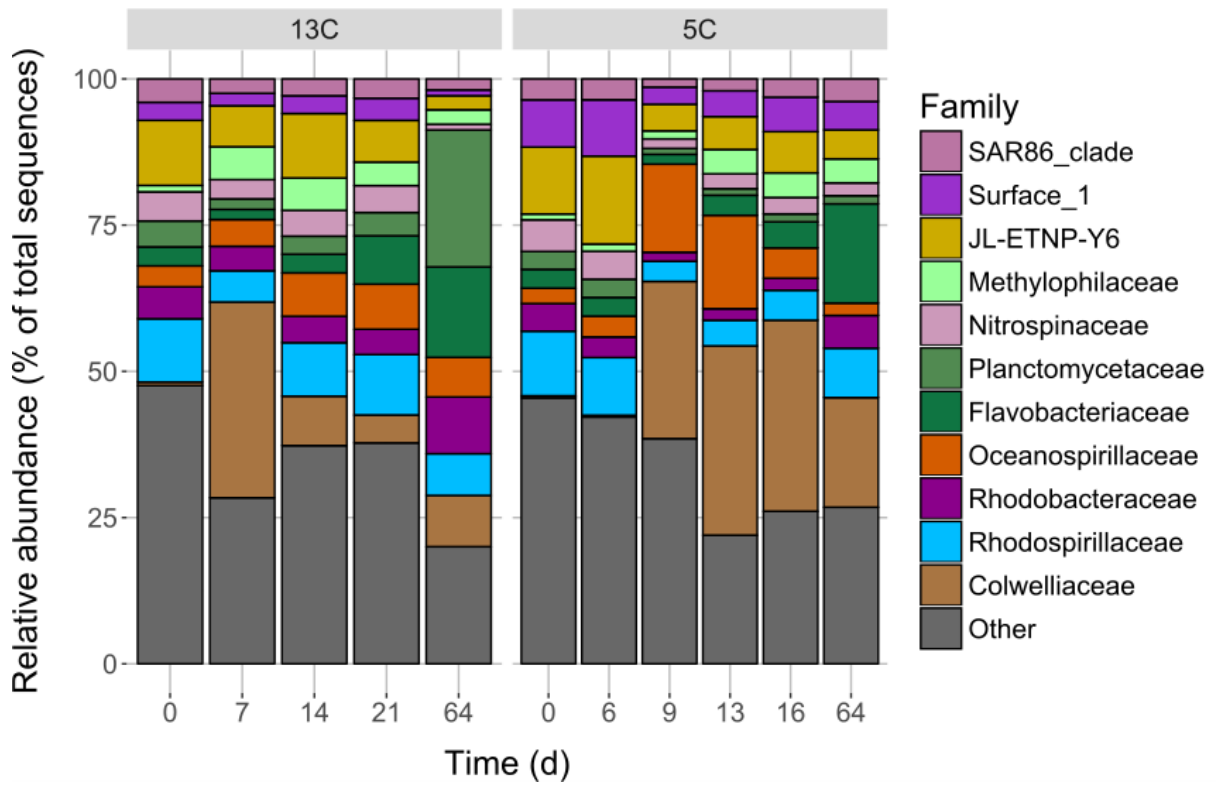

Figure S1. Microbial community composition in control samples for both temperatures (5 °C and 13 °C) over the incubation period of 64 days.
