# Supplementary material for: Oil type and temperature dependent biodegradation dynamics - Combining chemical and microbial community data through multivariate analysis
Source: BMC Microbiol. 2018 Aug 7;18:83. doi: 10.1186/s12866-018-1221-9 (PMC6081865; doi:10.1186/s12866-018-1221-9)
Supplement: Supplementary file 2 — Table S2. Calculated half-lives for targeted oil compounds. (PDF 72 kb) [file 12866_2018_1221_MOESM2_ESM.pdf]

Table S2. Calculated half-lives for targeted oil compounds

|                 | Lag phase + half-life (days) |              |               |              | Lag phase (days) |              |               |              |
|-----------------|------------------------------|--------------|---------------|--------------|------------------|--------------|---------------|--------------|
|                 | Troll<br>13°C                | Troll<br>5°C | Grane<br>13°C | Grane<br>5°C | Troll<br>13°C    | Troll<br>5°C | Grane<br>13°C | Grane<br>5°C |
| <b>nC-10</b>    | nd                           | nd           | nd            | nd           | nd               | nd           | nd            | nd           |
| <b>nC-11</b>    | nd                           | nd           | nd            | nd           | nd               | nd           | nd            | nd           |
| <b>nC-12</b>    | nd                           | nd           | 3,2           | 13,0         | nd               | nd           | 2,9           | 12,9         |
| <b>nC-13</b>    | nd                           | nd           | 3,1           | 9,3          | nd               | nd           | 2,9           | 7,9          |
| <b>nC-14</b>    | nd                           | 9,1          | 3,1           | 9,3          | nd               | 9,0          | 3,0           | 8,0          |
| <b>nC-15</b>    | 6,6                          | 13,1         | 3,1           | 9,1          | 6,3              | 8,3          | 3,0           | 7,7          |
| <b>nC-16</b>    | 6,8                          | 13,2         | 3,8           | 8,8          | 6,6              | 8,4          | 2,5           | 6,5          |
| <b>nC-17</b>    | 6,4                          | 14,0         | 3,9           | 8,3          | 5,7              | 8,0          | 2,5           | 5,6          |
| <b>Pristane</b> | 8,5                          | 19,6         | 8,9           | 21,3         | 6,9              | 16,0         | 6,8           | 15,8         |
| <b>nC-18</b>    | 5,6                          | 13,3         | 3,8           | 8,2          | 4,0              | 7,9          | 2,6           | 5,6          |
| <b>Phytane</b>  | 9,0                          | 24,3         | 10,1          | 23,8         | 6,9              | 21,0         | 7,0           | 15,8         |
| <b>nC-19</b>    | 6,8                          | 13,7         | 3,9           | 8,5          | 6,6              | 8,0          | 2,6           | 5,6          |
| <b>nC-20</b>    | 6,8                          | 11,6         | 11,8          | 8,6          | 6,6              | 6,0          | 9,1           | 5,5          |
| <b>nC-21</b>    | 5,1                          | 13,4         | 3,9           | 8,4          | 2,8              | 8,2          | 2,7           | 5,5          |
| <b>nC-22</b>    | 4,8                          | 13,0         | 3,9           | 8,8          | 2,7              | 12,8         | 2,8           | 6,9          |
| <b>nC-23</b>    | 5,0                          | 13,5         | 4,0           | 8,5          | 2,9              | 8,3          | 2,8           | 5,7          |
| <b>nC-24</b>    | 5,2                          | 14,5         | 4,1           | 9,3          | 3,1              | 8,6          | 2,8           | 6,5          |
| <b>nC-25</b>    | 5,6                          | 15,1         | 4,4           | 9,8          | 3,6              | 8,6          | 2,8           | 6,5          |
| <b>nC-26</b>    | 5,3                          | 14,6         | 4,2           | 9,8          | 3,1              | 8,6          | 2,8           | 7,0          |
| <b>nC-27</b>    | 5,8                          | 15,6         | 4,3           | 10,4         | 4,4              | 8,8          | 2,8           | 5,7          |
| <b>nC-28</b>    | 5,6                          | 16,9         | 4,3           | 12,9         | 4,1              | 12,0         | 2,8           | 6,8          |
| <b>nC-29</b>    | 5,8                          | 17,9         | 4,5           | 16,4         | 4,1              | 12,3         | 2,8           | 6,8          |
| <b>nC-30</b>    | 6,3                          | 17,9         | 4,7           | 16,9         | 4,8              | 15,0         | 2,7           | 7,1          |
| <b>nC-31</b>    | 6,9                          | 16,3         | 4,9           | 20,2         | 6,6              | 15,9         | 3,0           | 10,2         |
| <b>nC-32</b>    | 6,9                          | 16,4         | 6,8           | 20,1         | 6,7              | 15,9         | 6,6           | 11,6         |
| <b>nC-33</b>    | 6,9                          | 16,7         | 5,1           | 20,2         | 6,7              | 16,0         | 2,7           | 12,2         |
| <b>nC-34</b>    | 0,1                          | 16,7         | 6,8           | 16,5         | 0,0              | 16,0         | 6,5           | 15,9         |
| <b>nC-35</b>    | 0,1                          | 16,3         | 6,8           | 19,1         | 0,0              | 15,9         | 6,5           | 12,6         |
| <b>nC-36</b>    | 0,1                          | 16,5         | 6,7           | 18,8         | 0,0              | 15,9         | 6,5           | 12,1         |

|                                     | Lag phase + half-life (days) |              |               |              | Lag phase (days) |              |               |              |
|-------------------------------------|------------------------------|--------------|---------------|--------------|------------------|--------------|---------------|--------------|
|                                     | Troll<br>13°C                | Troll<br>5°C | Grane<br>13°C | Grane<br>5°C | Troll<br>13°C    | Troll<br>5°C | Grane<br>13°C | Grane<br>5°C |
| <b>SUM n-alkanes</b>                | 6,669                        | 16,9         | 4,5           | 10,3         | 5,0              | 11,1         | 2,6           | 5,4          |
| <b>Naphthalene</b>                  | 1,0                          | 13,4         | 3,6           | 13,0         | 0,0              | 8,9          | 3,0           | 8,4          |
| <b>C4-naphthalenes</b>              | 5,8                          | 16,2         | 7,3           | 16,0         | 5,0              | 15,8         | 5,4           | 8,5          |
| <b>Fluorene</b>                     | 0,1                          | 15,9         | 6,5           | 15,7         | 0,0              | 14,6         | 6,3           | 14,2         |
| <b>C1-fluorenes</b>                 | 0,1                          | 16,2         | 6,9           | 15,1         | 0,0              | 15,8         | 6,7           | 7,4          |
| <b>C2-fluorenes</b>                 | 0,1                          | 16,4         | 7,1           | 18,0         | 0,0              | 15,9         | 6,9           | 10,6         |
| <b>C3-fluorenes</b>                 | 7,2                          | 16,5         | 14,0          | 23,1         | 7,0              | 16,0         | 13,8          | 10,2         |
| <b>Phenanthrene</b>                 | 0,1                          | 13,1         | 3,6           | 14,1         | 0,0              | 13,0         | 3,0           | 12,9         |
| <b>C1-phenanthrenes/anthracenes</b> | 0,1                          | 14,9         | 6,9           | 15,6         | 0,0              | 13,8         | 6,7           | 8,4          |
| <b>C2-phenanthrenes/anthracenes</b> | 7,0                          | 16,4         | 8,2           | 18,4         | 6,8              | 15,9         | 6,4           | 10,9         |
| <b>C3-phenanthrenes/anthracenes</b> | 14,1                         | 30,3         | 14,8          | 35,3         | 13,5             | 29,2         | 11,5          | 10,8         |
| <b>C4-phenanthrenes/anthracenes</b> | 15,0                         | 40,1         | 17,5          | 54,6         | 13,8             | 25,3         | 13,0          | 11,3         |
| <b>Dibenzothiophene</b>             | 0,3                          | 16,2         | 6,4           | 16,6         | 0,0              | 15,8         | 6,2           | 15,3         |
| <b>C1-dibenzothiophenes</b>         | 21,3                         | 16,3         | 7,0           | 24,1         | 6,0              | 15,8         | 6,7           | 8,5          |
| <b>C2-dibenzothiophenes</b>         | 6,9                          | 17,9         | 7,5           | 18,8         | 6,7              | 16,0         | 6,9           | 11,1         |
| <b>C3-dibenzothiophenes</b>         | 14,3                         | 30,3         | 15,2          | 37,7         | 6,1              | 29,2         | 11,5          | 8,9          |
| <b>C4-dibenzothiophenes</b>         | 14,5                         | 40,5         | 18,1          | 68,2         | 14,0             | 26,5         | 13,3          | 0,0          |
| <b>Fluoranthene</b>                 | 7,2                          | 28,8         | 7,2           | 28,2         | 7,0              | 27,6         | 7,0           | 24,5         |
| <b>Pyrene</b>                       | 7,0                          | 18,8         | 7,2           | 21,6         | 6,8              | 16,0         | 7,0           | 16,0         |
| <b>C1-fluoranthrenes/pyrenes</b>    | 11,9                         | 30,0         | 15,8          | 32,0         | 4,4              | 28,9         | 9,4           | 6,5          |
| <b>C2-fluoranthrenes/pyrenes</b>    | 22,3                         | 54,0         | nd            | 77,5         | 6,9              | 10,7         | nd            | 0,0          |
| <b>C3-fluoranthrenes/pyrenes</b>    | 24,8                         | 56,8         | nd            | 119,4        | 16,9             | 25,4         | nd            | 0,0          |
| <b>Chrysene</b>                     | 15,3                         | 30,8         | 14,1          | 30,9         | 13,9             | 29,7         | 13,9          | 29,9         |
| <b>C1-chrysenes</b>                 | 14,4                         | 30,9         | 18,8          | 88,4         | 14,0             | 29,9         | 12,4          | 3,2          |
| <b>C2-chrysenes</b>                 | 28,0                         | 34,4         | 27,3          | 127,7        | 19,1             | 30,0         | 17,2          | 0,0          |
| <b>C3-chrysenes</b>                 | 37,0                         | 100,8        | nd            | 650,9        | 15,6             | 39,6         | nd            | 0,0          |
| <b>SUM PAH</b>                      | 5,7                          | 16,3         | 9,3           | 18,4         | 2,4              | 12,9         | 5,8           | 10,1         |
| <b>n-C5 (Pentane)</b>               | 0,1                          | 19,5         | 5,9           | 15,9         | 0,0              | 16,0         | 5,2           | 14,4         |
| <b>n-C6 (Hexane)</b>                | 0,1                          | 14,3         | 3,0           | 6,1          | 0,0              | 9,9          | 2,9           | 5,8          |
| <b>n-C7 (Heptane)</b>               | 0,2                          | 1,1          | 0,0           | 5,9          | 0,0              | 0,0          | 0,0           | 5,8          |

|                        | Lag phase + half-life (days) |              |               |              | Lag phase (days) |              |               |              |
|------------------------|------------------------------|--------------|---------------|--------------|------------------|--------------|---------------|--------------|
|                        | Troll<br>13°C                | Troll<br>5°C | Grane<br>13°C | Grane<br>5°C | Troll<br>13°C    | Troll<br>5°C | Grane<br>13°C | Grane<br>5°C |
| <b>n-C8 (Octane)</b>   | nd                           | nd           | 0,1           | nd           | nd               | nd           | 0,0           | nd           |
| <b>n-C9 (Nonane)</b>   | nd                           | nd           | 0,1           | 0,0          | nd               | nd           | 0,0           | 0,0          |
| <b>n-C10 (Decane)</b>  | 0,3                          | nd           | 6,9           | 19,6         | 0,0              | nd           | 6,7           | 13,0         |
| <b>Benzene</b>         | 7,2                          | 16,7         | 7,0           | 17,8         | 7,0              | 16,0         | 6,8           | 16,0         |
| <b>Toluene</b>         | 6,7                          | 16,4         | 6,2           | 16,3         | 4,5              | 15,9         | 5,0           | 15,9         |
| <b>Ethylbenzene</b>    | 0,1                          | 16,2         | 5,0           | 16,1         | 0,0              | 15,8         | 4,3           | 15,6         |
| <b>m-Xylene</b>        | 0,1                          | 13,7         | 3,8           | 14,2         | 0,0              | 13,0         | 3,0           | 12,8         |
| <b>p-Xylene</b>        | 0,1                          | 14,1         | 3,7           | 14,6         | 0,0              | 13,1         | 3,0           | 13,5         |
| <b>o-Xylene</b>        | 0,1                          | 16,2         | 6,4           | 16,1         | 0,0              | 15,8         | 6,2           | 15,7         |
| <b>Propylbenzene</b>   | 0,1                          | 16,1         | 3,7           | 14,9         | 0,0              | 14,8         | 3,0           | 12,4         |
| <b>n-Butylbenzene</b>  | 0,1                          | 14,2         | 3,2           | 13,9         | 0,0              | 12,7         | 3,0           | 12,1         |
| <b>n-Pentylbenzene</b> | nd                           | nd           | nd            | nd           | nd               | nd           | nd            | nd           |
| <b>SUM VOC</b>         | 7,0                          | 16,2         | 3,0           | 16,1         | 6,8              | 15,8         | 2,9           | 15,7         |
